# Supplementary material
Source: Elsevier journal article supplement (https://www.sciencedirect.com/science/article/pii/S1578219016303389)
Supplement: mmc1 [file S1578219016303389:mmc1.pdf]

**Tabla. Estrategias de búsqueda en las bases referenciales masivas.**

**MEDLINE**

- 1 \*electroporation/ or \*electrochemotherapy/
- 2 (electroporation or electrochemotherapy or electropor\*meabilization).ti,ab.
- 3 exp \*Melanoma/co, dt, mo, su, th [Complications, Drug Therapy, Mortality, Surgery, Therapy]
- 4 melanoma\*.ti,ab.
- 5 1 or 2
- 6 3 or 4
- 7 5 and 6
- 8 limit 7 to (editorial or letter)
- 9 7 not 8
- 10 limit 9 to (clinical trial, all or comparative study or controlled clinical trial or evaluation studies or meta analysis or multicenter study or pragmatic clinical trial or randomized controlled trial or "review" or systematic reviews)
- 11 Survival Analysis/

| Tabla. Estrategias de búsqueda en las bases referenciales masivas.                    |                                                                               |
|---------------------------------------------------------------------------------------|-------------------------------------------------------------------------------|
| 12                                                                                    | Treatment Outcome/                                                            |
| 13                                                                                    | Follow-Up Studies/                                                            |
| 14                                                                                    | Prospective Studies/                                                          |
| 15                                                                                    | 11 or 12 or 13 or 14                                                          |
| 16                                                                                    | 9 and 15                                                                      |
| 17                                                                                    | 10 or 16                                                                      |
| 18                                                                                    | (effectiv* or efficacy or response or (disease adj3 free) or survival).ti,ab. |
| 19                                                                                    | 9 and 18                                                                      |
| 20                                                                                    | 17 or 19                                                                      |
| <b>EMBASE</b>                                                                         |                                                                               |
| #10 #9 AND [embase]/lim                                                               |                                                                               |
| #9 #8 AND [humans]/lim                                                                |                                                                               |
| #8 #7 AND ([article]/lim OR [article in press]/lim OR [review]/lim)                   |                                                                               |
| #7 #3 AND #6                                                                          |                                                                               |
| #6 #4 OR #5                                                                           |                                                                               |
| #5 electroporation:ab,ti OR electrochemotherapy:ab,ti OR lectropermeabili*ation:ab,ti |                                                                               |

|                                                                                                                                                                                                                                                                                                                                                                       |
|-----------------------------------------------------------------------------------------------------------------------------------------------------------------------------------------------------------------------------------------------------------------------------------------------------------------------------------------------------------------------|
| <b>Tabla. Estrategias de búsqueda en las bases referenciales masivas.</b>                                                                                                                                                                                                                                                                                             |
| #4 'electroporation'/mj OR 'electrochemotherapy'/mj<br><br>#3 #1 OR #2<br><br>#2 melanoma*:ab,ti<br><br>#1 'melanoma'/exp/mj                                                                                                                                                                                                                                          |
| <b>Science Citation Index <i>expanded</i></b><br><br># 3    148    #2 AND #1<br><br># 2    5.534.170    TS=(effectiv* or efficacy or response or (disease near/3 free) or survival)<br><br># 1    216    TS=electrochemotherap* and TS=melanoma*<br><br>Índices=SCI-EXPANDED, SSCI, A&HCI, CPCI-S, CPCI-SSH, CCR-EXPANDED, IC<br><br>Período de tiempo=Todos los años |

| <b>Tabla . Formato PICO de la pregunta de investigación.</b> |                                                                                                                                                                                                                                                                                                                                                                                                                                                                                                                                                                                                                         |
|--------------------------------------------------------------|-------------------------------------------------------------------------------------------------------------------------------------------------------------------------------------------------------------------------------------------------------------------------------------------------------------------------------------------------------------------------------------------------------------------------------------------------------------------------------------------------------------------------------------------------------------------------------------------------------------------------|
| <b>POBLACIÓN</b>                                             | <p>Pacientes con edad superior a 18 años con:</p> <ul style="list-style-type: none"> <li>▪ Metástasis de melanoma (en tránsito, satelitosis, a distancia) cutáneas y/o subcutáneas irresecables en cualquier localización anatómica. Estadios IIIB (N2c), IIIC (N2c y N3 )y IV (M1a por metástasis cutánea-subcutánea) de la TNM.</li> <li>▪ Melanoma cutáneo primario con criterios de irresecabilidad (afectación vásculo-nerviosa u otras estructuras) o resecable mediante cirugía mutilante.</li> <li>▪ Paciente con metástasis viscerales como tratamiento paliativo, para mejorar la calidad de vida.</li> </ul> |
| <b>INTERVENCIÓN</b>                                          | EQT en monoterapia y en terapia combinada con perfusión del miembro aislado en pacientes con alta carga tumoral.                                                                                                                                                                                                                                                                                                                                                                                                                                                                                                        |
| <b>COMPARADOR</b>                                            | Los melanomas que cumplen el criterio de irresecabilidad son candidatos a tres estrategias terapéuticas:                                                                                                                                                                                                                                                                                                                                                                                                                                                                                                                |

| Tabla . Formato PICO de la pregunta de investigación. |                                                                                                                                                                                                                                                                                                                                                                                                                                                |
|-------------------------------------------------------|------------------------------------------------------------------------------------------------------------------------------------------------------------------------------------------------------------------------------------------------------------------------------------------------------------------------------------------------------------------------------------------------------------------------------------------------|
|                                                       | <ul style="list-style-type: none"> <li>▪ Perfusión hipertérmica del miembro aislado.</li> <li>▪ Administración intralesional de interleukina2, bleomicina, o perilesional de GM-CSF (<i>granulocyte-macrophage colony-stimulating factor</i>).</li> <li>▪ Radioterapia locorregional.</li> <li>▪ Tratamiento sistémico: quimioterapia, bioquimioterapia, inmunoterapia.</li> </ul>                                                             |
| RESULTADO                                             | <p><b>Efectividad</b></p> <ul style="list-style-type: none"> <li>▪ Respuesta clínica, que puede medirse como, respuesta completa (RC), respuesta parcial (RP), periodo libre de enfermedad (PLE, o similares), supervivencia total (ST), y tasas de recurrencia (TR), enfermedad estable sin cambios (NC).</li> </ul> <p><b>Seguridad</b></p> <ul style="list-style-type: none"> <li>▪ Efectos adversos asociados al procedimiento.</li> </ul> |

| Tabla . Formato PICO de la pregunta de investigación.                                                                                                                                                                                                                                                          |                                                                                                       |
|----------------------------------------------------------------------------------------------------------------------------------------------------------------------------------------------------------------------------------------------------------------------------------------------------------------|-------------------------------------------------------------------------------------------------------|
|                                                                                                                                                                                                                                                                                                                | <ul style="list-style-type: none"> <li>▪ Toxicidad local o regional o toxicidad sistémica.</li> </ul> |
| <p>PICO: <i>population (P), intervention (I), comparison (C) and outcome(s) (O)</i>. En este trabajo se han utilizado los criterios de irresecabilidad y TNM correspondiente al melanoma locorregionalmente avanzado de acuerdo con la clasificación del <i>American Joint Committee of Cancer (AJCC)</i>.</p> |                                                                                                       |

| Tabla . Tabla de evidencia de los artículos analizados. |                                                                                                               |                                                                                                                      |                                                                |                                                                                                        |
|---------------------------------------------------------|---------------------------------------------------------------------------------------------------------------|----------------------------------------------------------------------------------------------------------------------|----------------------------------------------------------------|--------------------------------------------------------------------------------------------------------|
| ESTUDIO                                                 | PACIENTES<br>N / SEXO / EDAD                                                                                  | TIPO DE ESTUDIO<br>(METODOLOGÍA) /<br>SEGUIMIENTO                                                                    | INTERVENCIÓN (VÍA<br>DE ADMINISTRACIÓN Y<br>QUIMIOTERÁPICO)    | RESULTADOS/<br>NIVEL DE<br>EVIDENCIA                                                                   |
| Spratt _2014                                            | 915 pacientes con<br>4.313 metástasis<br>cutáneas de los que<br>3.591 (83,3%) eran de<br>melanoma. 61 años de | Metaanálisis de 47 estudios (8<br>ECA, 38 ensayos no<br>aleatorizados y 1 serie<br>prospectiva). Pacientes con tumor | Varios tratamientos.<br><br>11 estudios realizados<br>con EQT. | Tasa de RC: 61,7%<br>(52,5-70,1%, CI<br>95%) (tras ajustar<br>por sesgos); tasa de<br>RO: 60,2% (50,6- |

| Tabla . Tabla de evidencia de los artículos analizados. |                                                                                       |                                                                                                                                                                                              |                                                                                           |                                                                                                                                                                                            |
|---------------------------------------------------------|---------------------------------------------------------------------------------------|----------------------------------------------------------------------------------------------------------------------------------------------------------------------------------------------|-------------------------------------------------------------------------------------------|--------------------------------------------------------------------------------------------------------------------------------------------------------------------------------------------|
| ESTUDIO                                                 | PACIENTES<br>N / SEXO / EDAD                                                          | TIPO DE ESTUDIO<br>(METODOLOGÍA) /<br>SEGUIMIENTO                                                                                                                                            | INTERVENCIÓN (VÍA<br>DE ADMINISTRACIÓN Y<br>QUIMIOTERÁPICO)                               | RESULTADOS/<br>NIVEL DE<br>EVIDENCIA                                                                                                                                                       |
|                                                         | mediana de edad.                                                                      | primario maligno de piel.                                                                                                                                                                    |                                                                                           | 69% CI 95%)<br><br>Nivel de evidencia<br>2++                                                                                                                                               |
| AETS_2011                                               | 693 pacientes con<br>2.730 nódulos<br>tumores. Edad<br>media $56,9 \pm 11,3$<br>años. | La revisión incluye un total de 26<br>publicaciones de las 195<br>referencias inicialmente<br>identificadas, de las cuales 13<br>son series de casos y 13 son<br>estudios con grupo control. | El tratamiento más<br>frecuente fue bleomicina<br>(76%) IT 48%, IV 36% y<br>conjunta 16%. | Tras seguimiento de<br>$9,7 \pm 1,39$ meses se<br>obtuvo RC en el<br>60% de los nódulos,<br>RP en 22,8%, sin<br>cambios en 10,5% y<br>progresión en 5,6%.<br><br>Nivel de evidencia<br>2++ |

| Tabla . Tabla de evidencia de los artículos analizados. |                                                                                      |                                                                                                                                                                |                                                                                                     |                                                                                                                |
|---------------------------------------------------------|--------------------------------------------------------------------------------------|----------------------------------------------------------------------------------------------------------------------------------------------------------------|-----------------------------------------------------------------------------------------------------|----------------------------------------------------------------------------------------------------------------|
| ESTUDIO                                                 | PACIENTES<br>N / SEXO / EDAD                                                         | TIPO DE ESTUDIO<br>(METODOLOGÍA) /<br>SEGUIMIENTO                                                                                                              | INTERVENCIÓN (VÍA<br>DE ADMINISTRACIÓN Y<br>QUIMIOTERÁPICO)                                         | RESULTADOS/<br>NIVEL DE<br>EVIDENCIA                                                                           |
| Mali_2013                                               | 197 pacientes (1.466 tumores), el 17,2 % con diámetro $\geq 3$ cm y 82,8 % $< 3$ cm. | RSL sobre efectividad de EQT en distintos tamaños entre enero de 1991 y noviembre de 2011. De los 132 estudios relevantes, se incluyeron 9 en el metaanálisis. | Una sola aplicación de EQT.                                                                         | RC 59% y RO 85% en $\geq 3$ cm frente a 33,3 y 68%, respectivamente, en $< 3$ cm.<br><br>Nivel de evidencia 1- |
| Caracò_2013                                             | 60 pacientes. Edad media 62 años (27 a 89)                                           | Estudio descriptivo retrospectivo de una serie de 60 pacientes a los que se administró una media de 73 aplicaciones de EQT y se hizo un seguimiento medio de   | De 1 a 5 sesiones de EQT con bleomicina IV 15.000 UI seguidas de pulsos de EP a los 8 y 28 minutos. | A los tres meses el 38,3 % (23 pacientes) RP, y el 48% (29) RC. Ocho pacientes tuvieron                        |



| Tabla . Tabla de evidencia de los artículos analizados. |                                                                 |                                                                      |                                                                             |                                                                                      |
|---------------------------------------------------------|-----------------------------------------------------------------|----------------------------------------------------------------------|-----------------------------------------------------------------------------|--------------------------------------------------------------------------------------|
| ESTUDIO                                                 | PACIENTES<br>N / SEXO / EDAD                                    | TIPO DE ESTUDIO<br>(METODOLOGÍA) /<br>SEGUIMIENTO                    | INTERVENCIÓN (VÍA<br>DE ADMINISTRACIÓN Y<br>QUIMIOTERÁPICO)                 | RESULTADOS/<br>NIVEL DE<br>EVIDENCIA                                                 |
|                                                         |                                                                 | 27,5 meses (6 a 67)                                                  |                                                                             | progresión de la<br>enfermedad o<br>ninguna respuesta.<br><br>Nivel de evidencia 3   |
| Ricotti_2013                                            | 30 pacientes (654<br>lesiones). Edad media<br>75 años (56 a 85) | Estudio prospectivo no<br>aleatorizado.<br><br>Seguimiento 20 meses. | Bleomicina IV 15.000 UI<br>seguido de pulsos de EP<br>a los 8 y 28 minutos. | RC en 20% (6<br>pacientes). RP en<br>80% (24 pacientes).<br><br>Nivel de evidencia 3 |
| Solari_2014                                             | 20 pacientes. Edad<br>media 72 años (47 a<br>91)                | Estudio prospectivo no<br>aleatorizado.<br><br>Seguimiento 6 meses.  | Bleomicina IV 15.000 UI<br>seguido de pulsos de EP<br>a los 8 y 30 minutos. | RC 10 % (2<br>pacientes), RP 45%<br>(9), sin respuesta<br>15% (3), progresión        |

Tabla . Tabla de evidencia de los artículos analizados.

| ESTUDIO        | PACIENTES<br>N / SEXO / EDAD                         | TIPO DE ESTUDIO<br>(METODOLOGÍA) /<br>SEGUIMIENTO                                                                                                                              | INTERVENCIÓN (VÍA<br>DE ADMINISTRACIÓN Y<br>QUIMIOTERÁPICO)                                                                 | RESULTADOS/<br>NIVEL DE<br>EVIDENCIA                                                                    |
|----------------|------------------------------------------------------|--------------------------------------------------------------------------------------------------------------------------------------------------------------------------------|-----------------------------------------------------------------------------------------------------------------------------|---------------------------------------------------------------------------------------------------------|
|                |                                                      |                                                                                                                                                                                | Se describen efectos<br>adversos no graves                                                                                  | 30% (6).<br>Nivel de evidencia 3                                                                        |
| Skarlatos_2011 | 5 pacientes (7<br>lesiones). Edad media<br>69,8 años | Prospectivo multicéntrico no<br>aleatorizado 52 pacientes con<br>enfermedad metastasica y<br>progresiva, 9 de ellos de piel de<br>los que 5 eran melanomas (7<br>aplicaciones) | Bleomicina IV 15.000 UI/<br>cm <sup>2</sup> de 1.000 UI/cm <sup>3</sup><br>seguido de pulsos de EP<br>a los 8 y 20 minutos. | RC 3 pacientes, RP<br>2 pacientes.<br>No se describieron<br>efectos secundarios<br>Nivel de evidencia 3 |

ECA: ensayo clínico aleatorizado. RSL: revisión sistemática de la literatura. RC: respuesta completa. RP: respuesta parcial. RO: respuesta objetiva. IT: intratumoral. IV: intravenosa. CI: intervalo de confianza. EP: electroporación.
